# Supplementary material for: Construction of a Bis(benzene sulfonyl)imide-Based Single-ion Polymer Artificial Layer for a Steady Lithium Metal Anode
Source: MDPI journal article supplement (doi:10.3390/polym15163490), 2023-08-21
Supplement: s1 [file s1]

# Construction of A bis(benzene sulfonyl)imide based single-ion polymer artificial layer for steady lithium metal anode

Yujie Wang<sup>1,2,#</sup>, Mengmeng Zhao<sup>2,#</sup>, Yazhou Chen<sup>1,2,3\*</sup>, Haifeng Bao<sup>1</sup> and Chen Li<sup>1,\*</sup>

<sup>1</sup> School of Materials Science and Engineering, Wuhan Textile University, 430200 Wuhan, China. wangyujie154@163.com; yzchen@wtu.edu.cn; baohaifeng@wtu.edu.cn; cli@wtu.edu.cn.

<sup>2</sup> State Key Laboratory for Hubei New Textile Materials and Advanced Processing Technology, Wuhan Textile University, 430200 Wuhan, China. [mmzhao@dicp.ac.cn](mailto:mmzhao@dicp.ac.cn).

<sup>3</sup> Hubei Key Laboratory for New Textile Materials and Applications, Wuhan Textile University, 430200 Wuhan, China.

\* Correspondence: yzchen@wtu.edu.cn (Y. Z. C.); cli@wtu.edu.cn (C. L.)

# Both authors contributed equally.

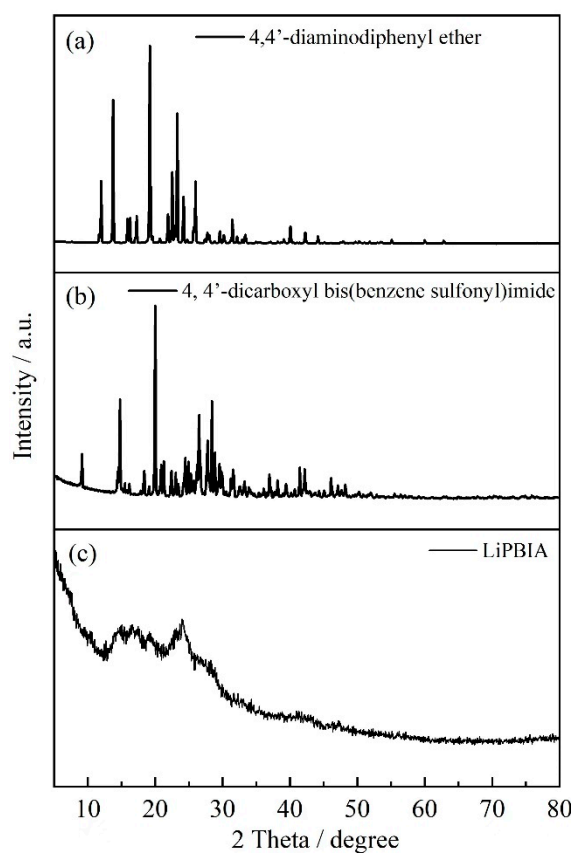

**Figure S1.** The XRD spectra. (a) 4,4'-dicarboxyl bis(benzene sulfonyl)imide. (b) 4,4'-diaminodiphenyl ether. (c) LiPBIA copolymer.

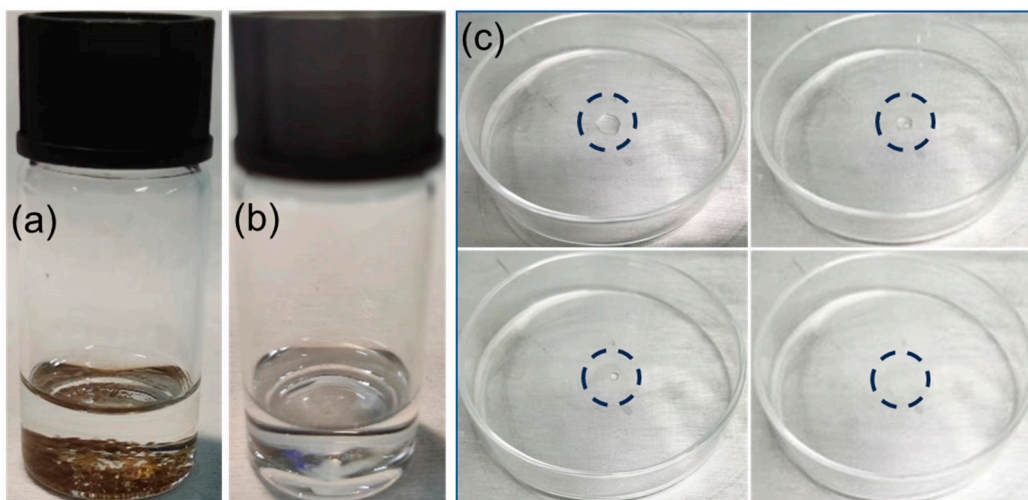

**Figure S2.** The optical photograph of (a) the LiPBIA dissolved in EC/DMC mixture solvent, (b) the EC/DMC mixture solvent after removed the LiPBIA particles and (c) the residual condition after the EC/DMC mixture solvent evaporation.

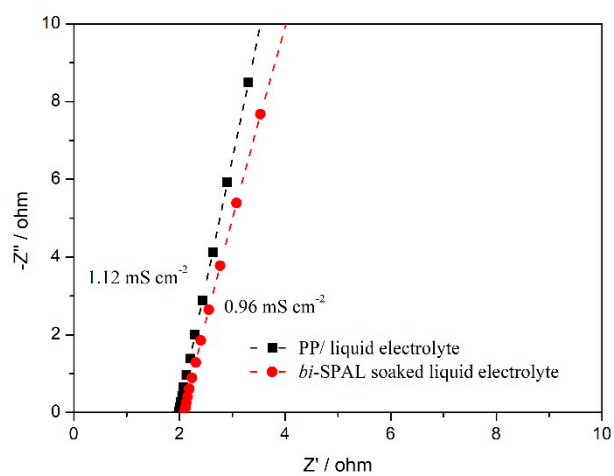

**Figure S3.** Ionic conductivity characterization of liquid electrolyte and *bi*-SPAL soaked liquid electrolyte.

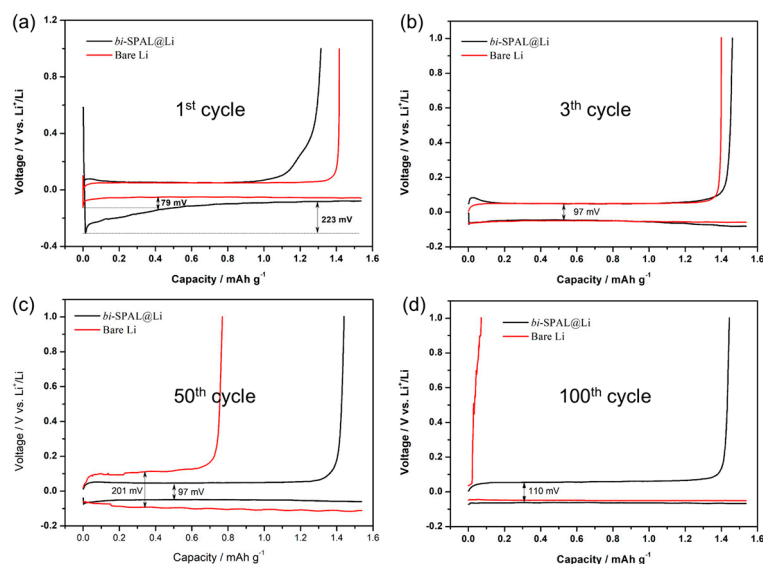

**Figure S4.** Plating/stripping curves of “Li | bare Cu” and “Li | *bi*-SPAL@Cu” cells. (a) The first cycle; (b) The third cycle; (c) The 50<sup>th</sup> cycle; (d) The 100<sup>th</sup> cycle.

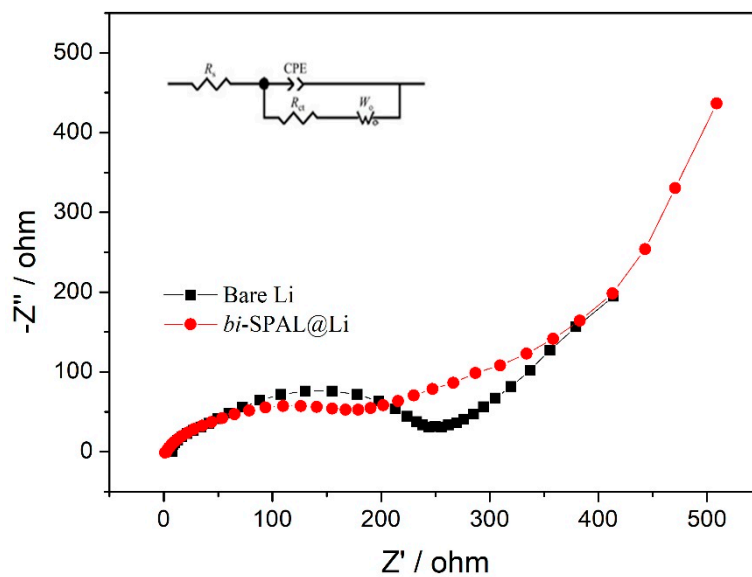

**Figure S5.** The Nyquist plots of the LFP|Li full cell after 20 cycles at 1 C with or without *bi*-SPAL.

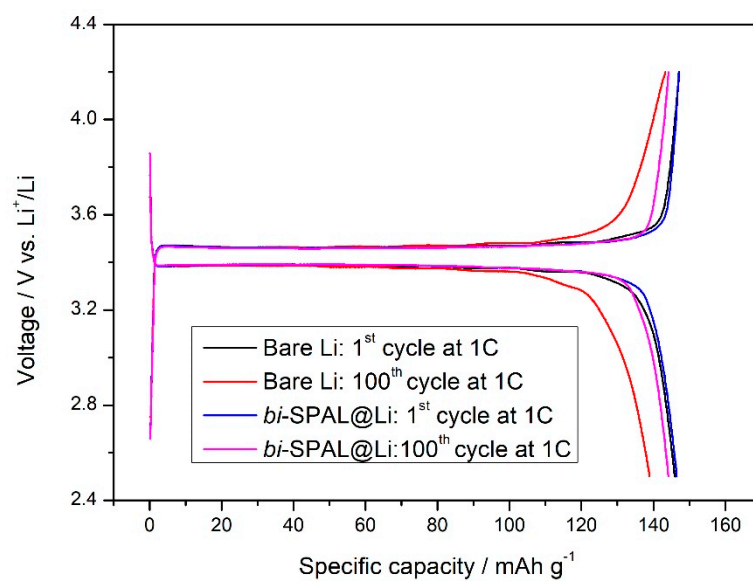

**Figure S6.** The charge/discharge curves of LFP/Li and LFP/bi-SPAL@Li cells at 1<sup>st</sup> cycle and 100<sup>th</sup> cycle.
